# Supplementary material for: Challenging Cognitive Construals: A Dynamic Alternative to Stable Misconceptions
Source: PubMed Central journal article supplement — CBE Life Sci Educ. 2018 Summer;17(2):ar34. doi: 10.1187/cbe.17-10-0214 (PMC5998328; doi:10.1187/cbe.17-10-0214), 2018

# Supplemental Material

*CBE—Life Sciences Education*

Gouvea and Simon

Figure S1

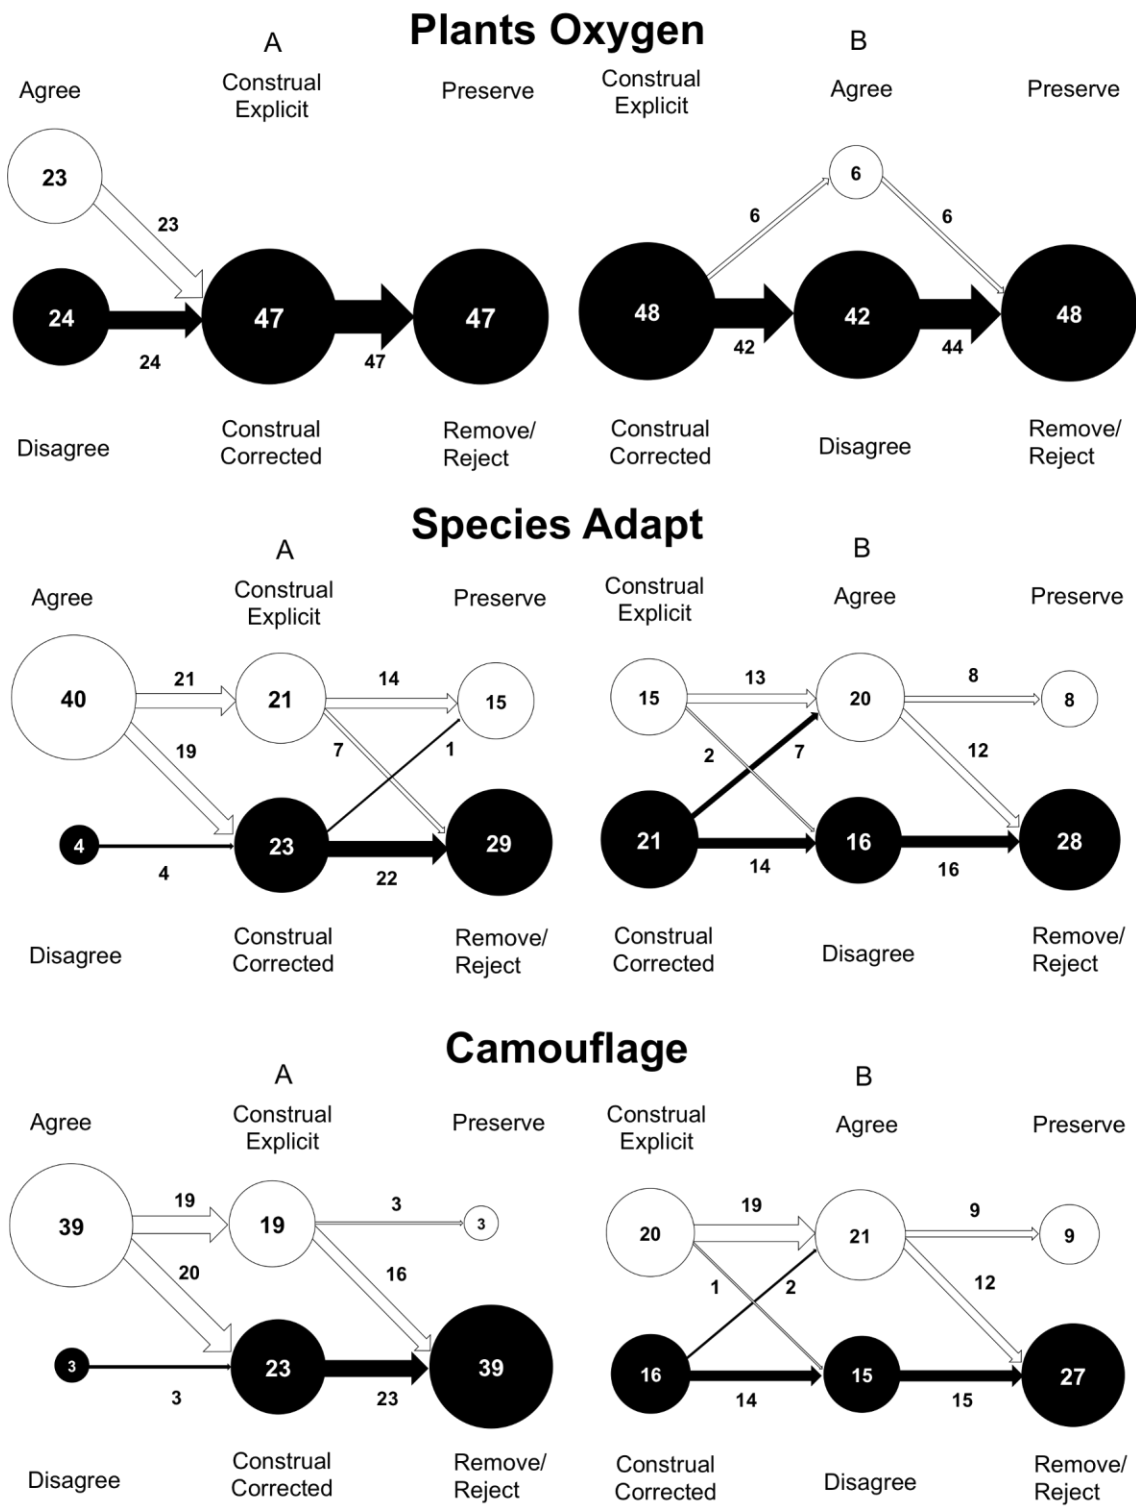

Figure S2

## Competition

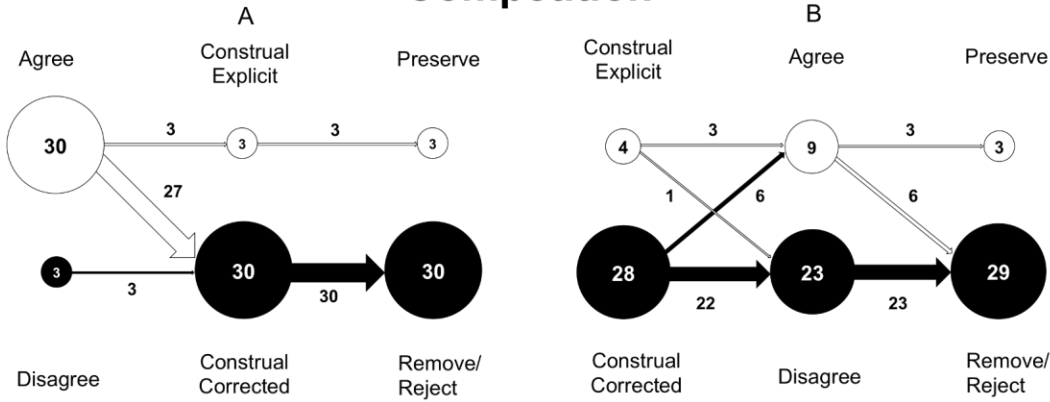

## Heart Decides

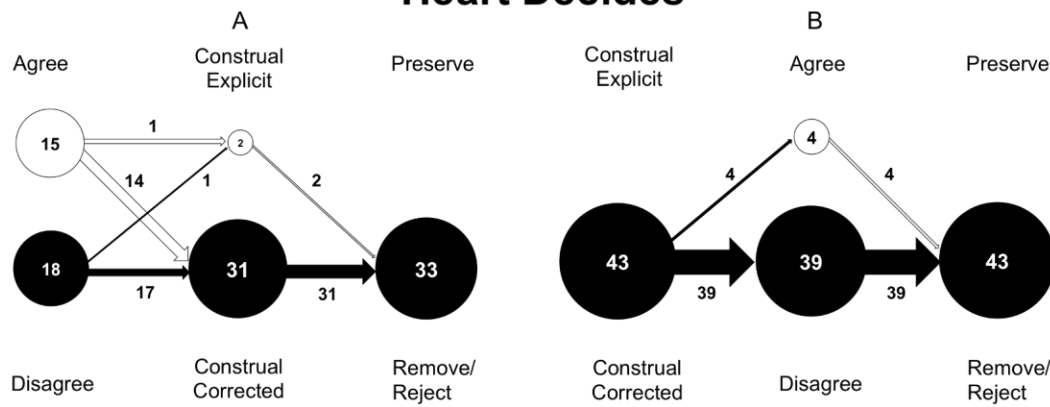

## Plants Eat

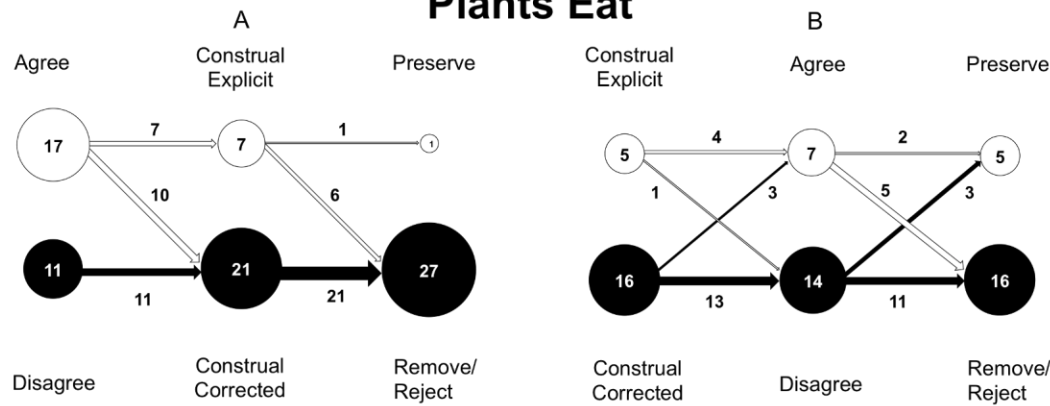

## Extinctions

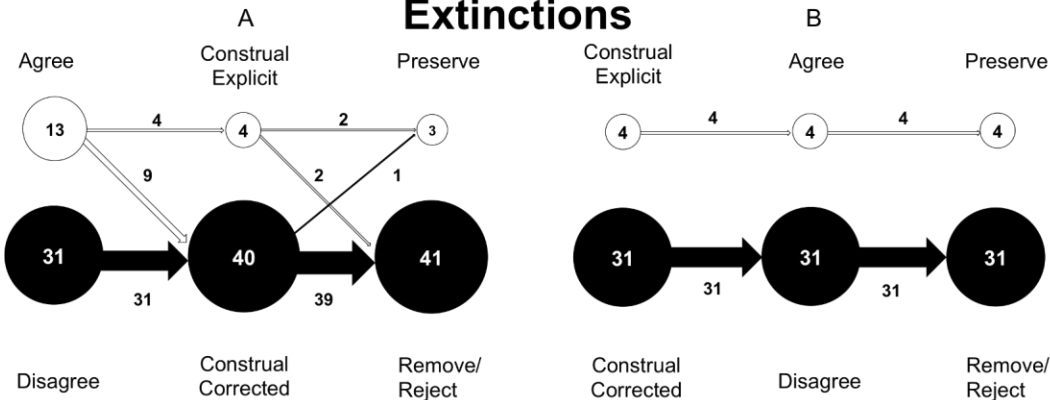

Figure S3

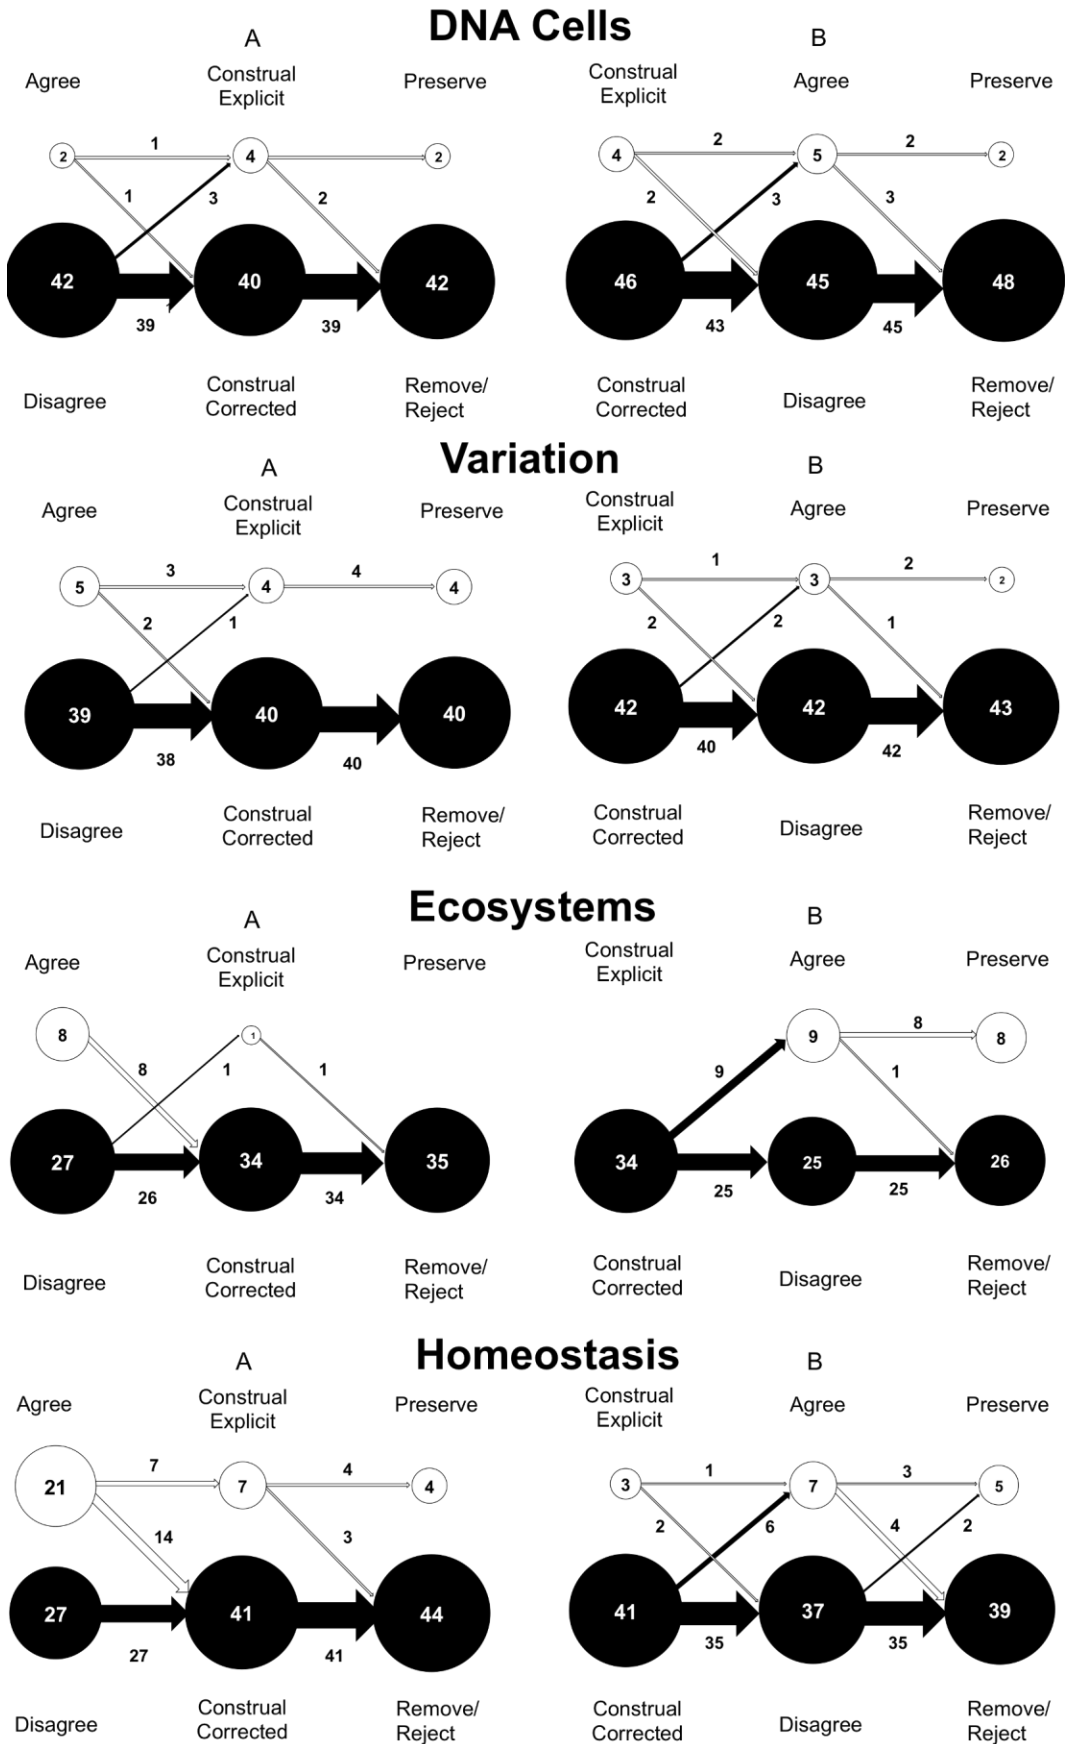

Supplement: cbe-17-ar34-s001.pdf [file cbe-17-ar34-s001.pdf]
